# Supplementary figures and images for: Evidence of the crucial role of the linker domain on the catalytic activity of human topoisomerase I by experimental and simulative characterization of the Lys681Ala mutant
Source: PubMed Central journal article supplement — Nucleic Acids Res. 2009 Sep 18;37(20):6849–58. doi: 10.1093/nar/gkp669 (PMC2777420; doi:10.1093/nar/gkp669), 2009-09-18

Supplementary material

Figure 10

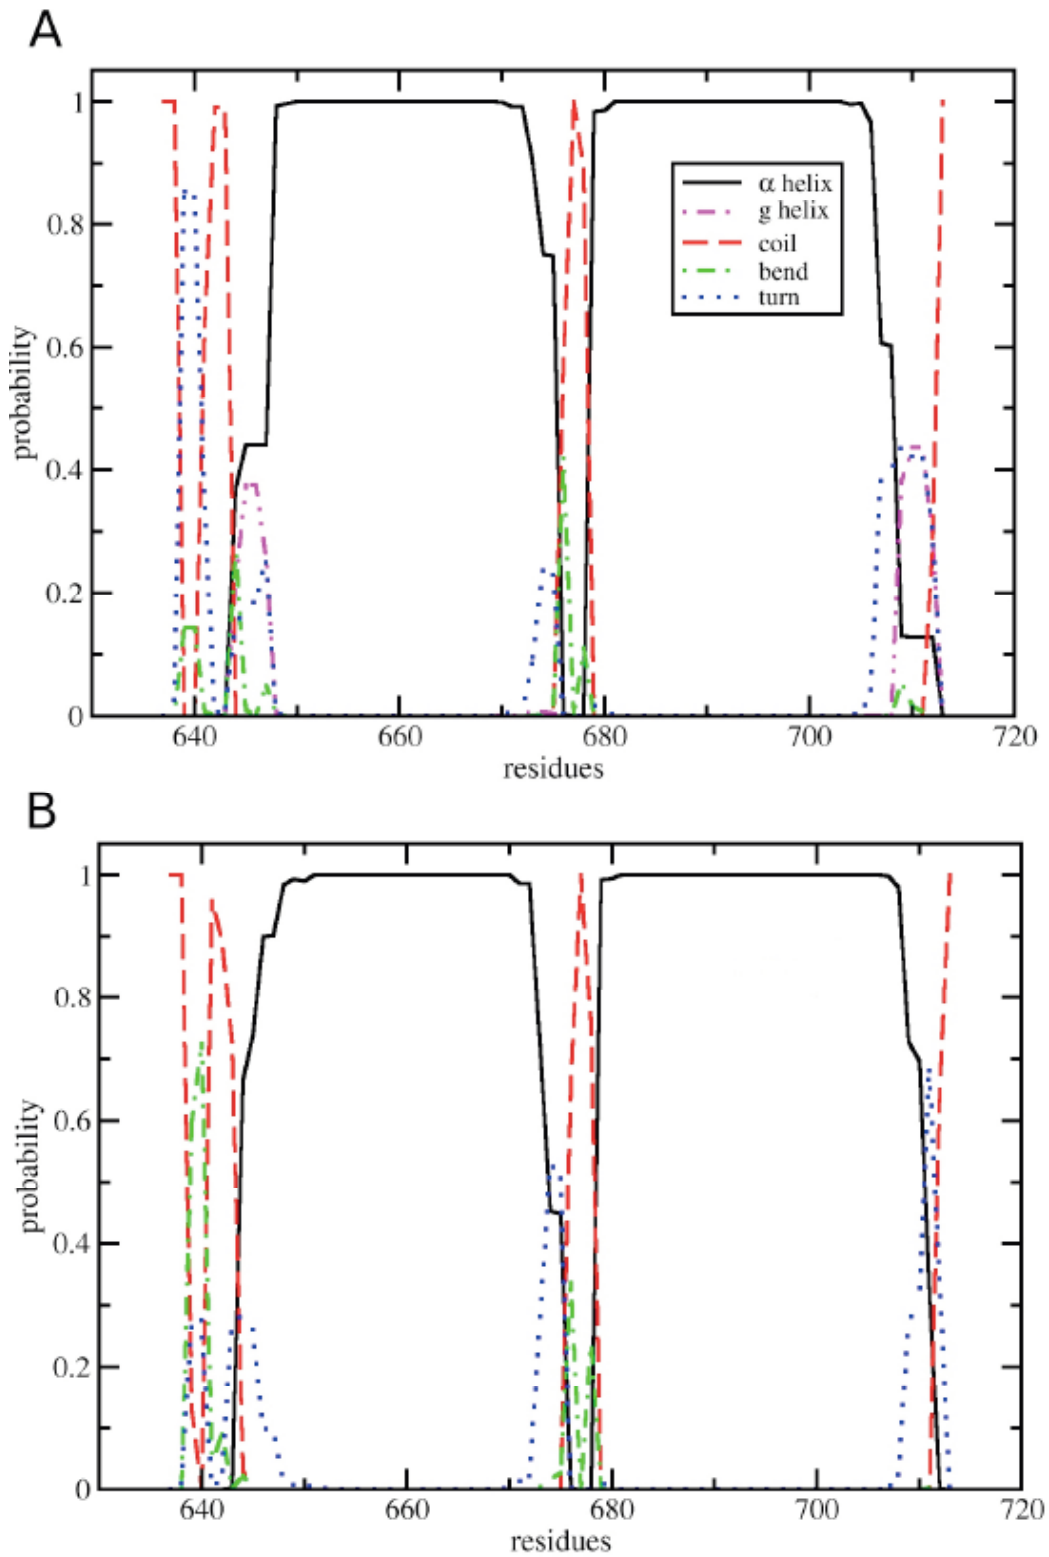

**Figure 11**

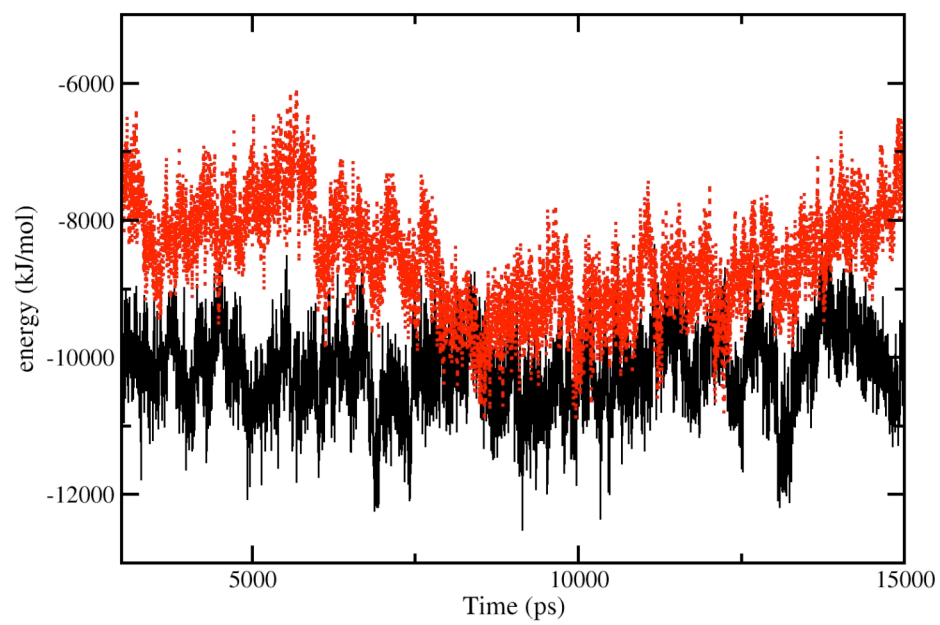

Supplement: gkp669_1.pdf [file gkp669_1.pdf]
